# Supplementary material for: Roles of septins in prospore membrane morphogenesis and spore wall assembly in Saccharomyces cerevisiae
Source: PubMed Central journal article supplement — Mol Biol Cell. 2016 Feb 1;27(3):442–50. doi: 10.1091/mbc.E15-10-0721 (PMC4751596; doi:10.1091/mbc.e15-10-0721), 2016-02-01
Supplement: supp_E15-10-0721v1_CombinedSupMats.pdf [file supp_E15-10-0721v1_CombinedSupMats.pdf]

# Supplemental Materials

*Molecular Biology of the Cell*

Heasley et al.

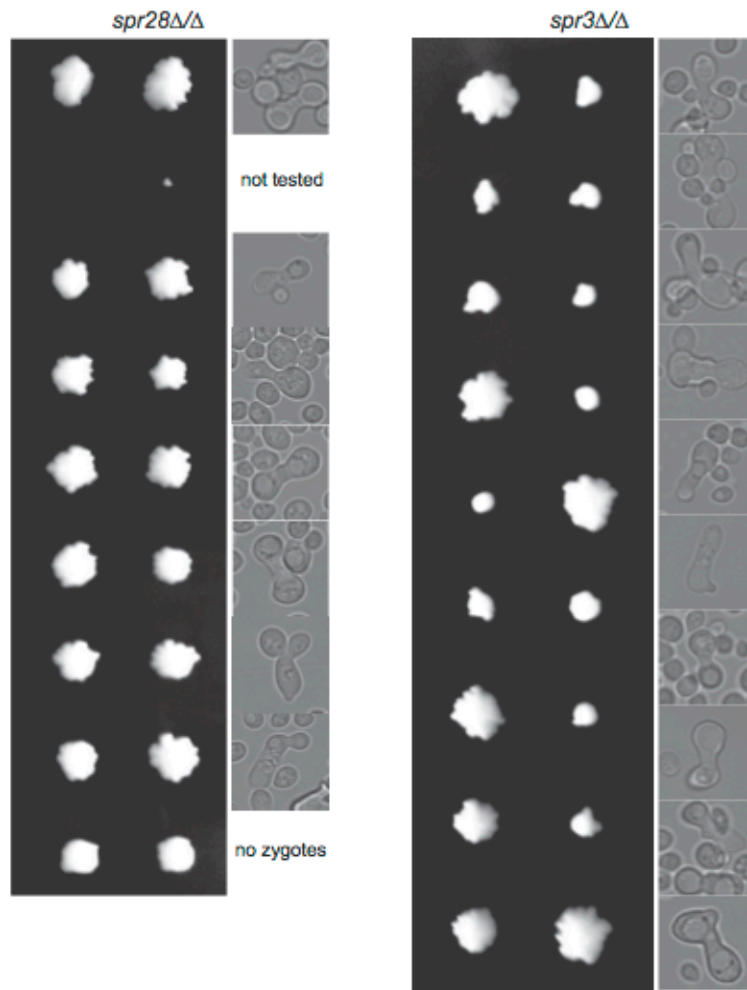

**Figure S1. Non-sister dyads produced by septin-mutant cells.** Utilizing a method to ensure ascus fidelity following enzymatic ascus wall removal (Davidow *et al.*, 1980), dyads produced by *spr3Δ/Δ* and *spr28Δ/Δ* diploids were dissected on YPD medium, allowed to grow into colonies at 22° for 4 days, and photographed. As *MAT* is centromere-linked and heterozygous in diploid cells, in NSDs the spores from a given dyad are usually able to mate with each other (Davidow *et al.*, 1980). Cells from dyad colonies were mixed together on YPD and incubated overnight. From these “mating” mixes cells were resuspended in water and visualized microscopically to identify zygotes, indicative of mating; images of representative zygotes are shown. If no zygote could be found, the dyad was scored as a sister dyad. For each genotype, the proportion of NSDs (7 of 8 for *spr28Δ/Δ*, 9 of 9 for *spr3Δ/Δ*) was significantly different than random;  $P < 0.05$  for two-tailed Chi squared tests compared to frequency expected from random segregation (50%). We note that the increased heterogeneity in colony shape/size in the *spr3Δ/Δ* mutants was largely due to an increase in the proportion of petites (i.e., cells lacking functional mitochondrial DNA). PSMs in LEP mutants (*ady3Δ*) capture mitochondria inefficiently, and perturbing septins (indirectly, via deletion of *GIP1*) makes this defect somewhat worse (Suda *et al.*, 2007). Thus, we speculate that the differences we observed in colony appearance reflect a similar problem in *spr3Δ/Δ* mutants.

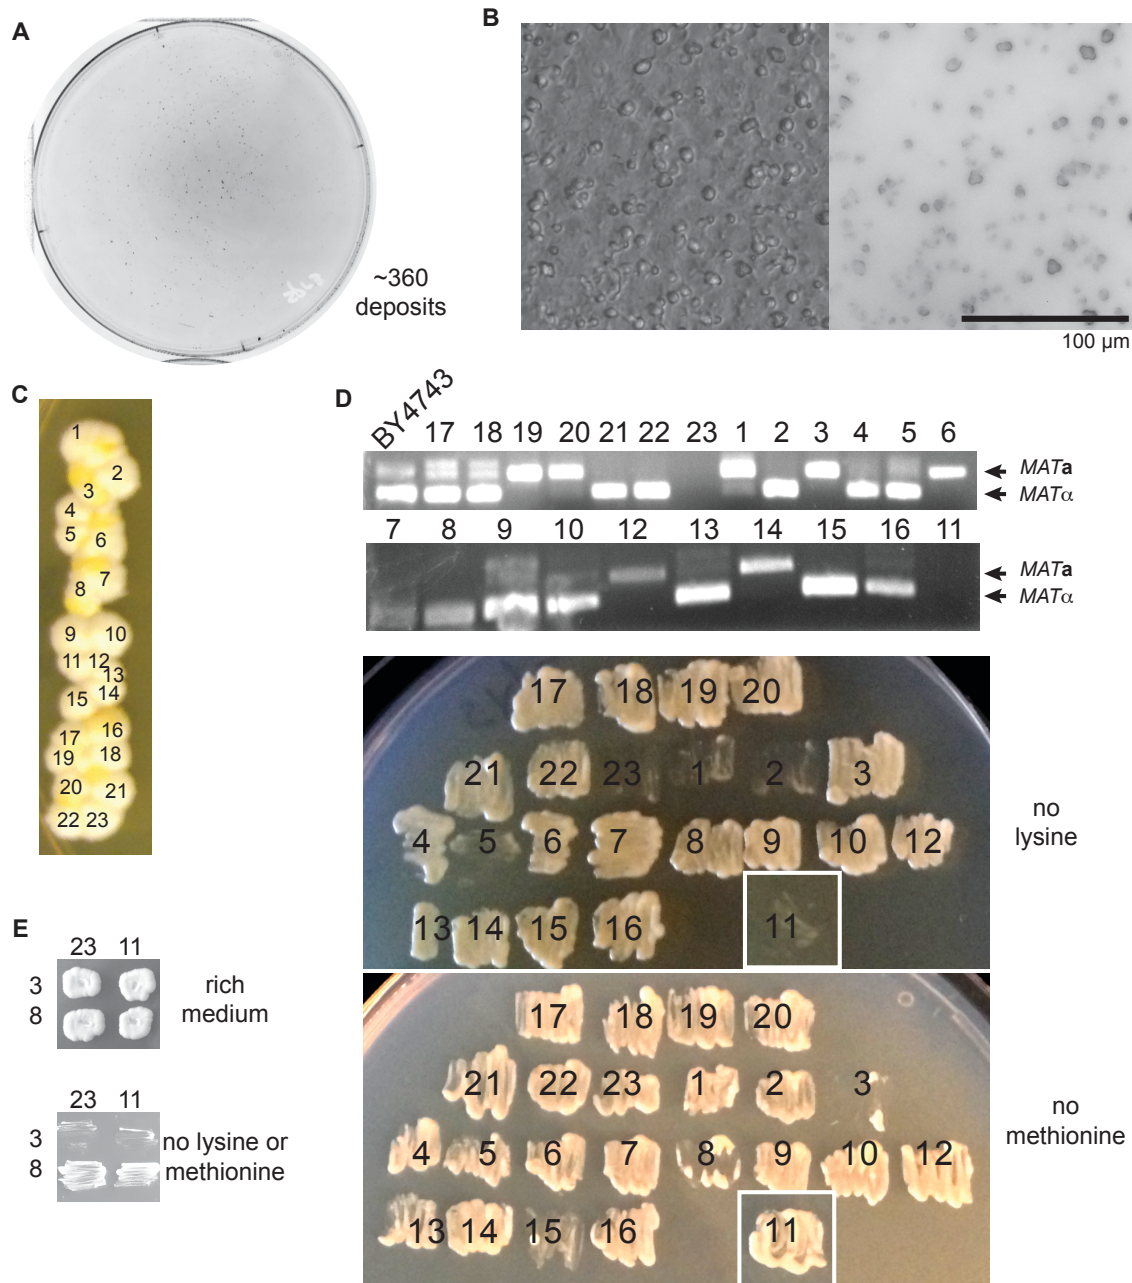

**Figure S2. Cytological and genetic analysis of yeast cells in *Drosophila* feces.** (A) Fluorescence scan of the lid of a petri dish in which adult *Drosophila* were fed a mixture of WT and *spr3Δ/Δ* sporulation cultures and allowed to defecate at will. Fecal deposits are visible as fluorescent speckles. (B) A single fecal deposit from the same lid as in (A) was examined by transmitted light and epifluorescence microscopy with a 40X objective and DAPI filter. (C) Resuspended fecal deposits from the lid in (A) were spread on a YPD plate and allowed to form colonies at 30°. Yellow colonies are a non-yeast microbial contaminant. Numbers indicate the 23 distinct colonies analyzed in (D). (D). Top, multiplex colony PCR using *MAT* allele-specific primers (Huxley *et al.*, 1990) and the colonies in (C). The diploid WT strain BY4743 is included

as a positive control for both alleles. Below, the same colonies were patched on solid synthetic medium lacking the indicated nutrient and incubated overnight at 30°. The patch representing colony #11 was on a different part of the same plates and is shown as an inset for the sake of image space. (E) To determine the mating types of colonies from (C) for which PCR failed in (D), cells from the indicated colonies were mixed together on rich medium overnight at 30°C and then patched from the mix to medium lacking lysine and methionine, to select for diploids resulting from successful mating.

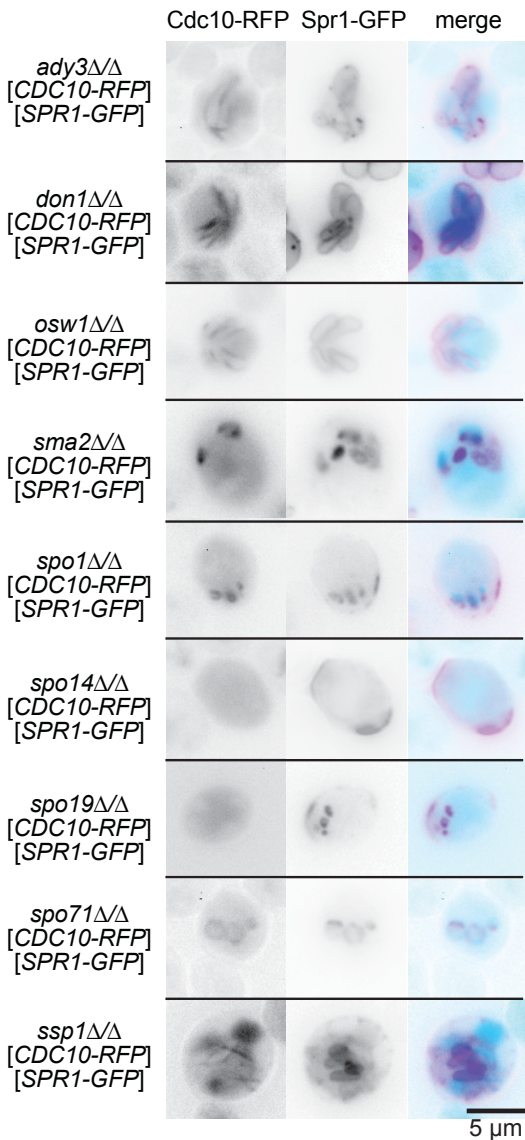

**Figure S3. Septin localization and lack of functional rescue by septin overexpression in various non-septin-mutant backgrounds.** Cdc10-RFP (pZL04) and Spr1-GFP (pSpr1-GFP) were co-expressed from plasmids in strains homozygous for deletion alleles of the indicated genes. Cells were sporulated as in Figure 1A and imaged with Texas Red and GFP filter cubes. Images of representative cells were false-colored and overlaid.

**Table S1. Yeast strains used in this study**

| STRAIN               | RELEVANT GENOTYPE                                                                 | SOURCE/REFERENCE                     |
|----------------------|-----------------------------------------------------------------------------------|--------------------------------------|
| BY4741               | <i>MATa his3Δ1 leu2Δ0 ura3Δ0 met15Δ0</i>                                          | (Brachmann <i>et al.</i> , 1998)     |
| BY4742               | <i>MATα his3Δ1 leu2Δ0 ura3Δ0 lys2Δ0</i>                                           | (Brachmann <i>et al.</i> , 1998)     |
| BY4743               | <i>MATa/α his3Δ1/his3Δ1 leu2Δ0/leu2Δ0 ura3Δ0/ura3Δ0 met15Δ0/MET15 lys2Δ0/LYS2</i> | (Brachmann <i>et al.</i> , 1998)     |
| YMBV20               | BY4743 <i>cdc12Δ::kanMX4/+</i>                                                    | (Winzeler <i>et al.</i> , 1999)      |
| YMBV33 <sup>a</sup>  | <i>MATa his3Δ1 leu2Δ0 lys2Δ0 ura3Δ0 cdc3Δ::kanMX4 [CDC3 URA3]</i>                 | (McMurray <i>et al.</i> , 2011)      |
| YMBV61 <sup>a</sup>  | BY4741 <i>cdc12Δ::kanMX4 [CDC12 URA3]</i>                                         | (McMurray <i>et al.</i> , 2011)      |
| JTY4338 <sup>a</sup> | BY4742 <i>cdc10Δ::kanMX4 [CDC10 URA3]</i>                                         | (McMurray <i>et al.</i> , 2011)      |
| MJY201 <sup>a</sup>  | BY4741 <i>cdc11Δ::HIS3MX6 [CDC11 URA3]</i>                                        | (McMurray <i>et al.</i> , 2011)      |
| JRY8012              | BY4741 <i>pdr5Δ::kanMX snq1Δ::kanMX yor1Δ::kanMX</i>                              | (Jeong <i>et al.</i> , 2007)         |
| MMY0019 <sup>b</sup> | JRY8012 <i>HTB2-tdTomato::HIS3MX</i>                                              | This work                            |
| FY2839               | <i>MATa his3Δ1 leu2Δ0 lys2Δ0 ura3Δ0 MKT1(G30) RME1 TAO3(Q1493)</i>                | Fred Winston, Harvard Medical School |
| FY2742               | <i>MATα his3Δ1 leu2Δ0 lys2Δ0 ura3Δ0 MKT1(G30) RME1 TAO3(Q1493)</i>                | Fred Winston, Harvard Medical School |
| MMY0150 <sup>c</sup> | FY2742 <i>spr3Δ::kanMX4</i>                                                       | This work                            |
| MMY0151              | BY4742 <i>spr3Δ::kanMX4</i>                                                       | (Winzeler <i>et al.</i> , 1999)      |
| MMY0220 <sup>c</sup> | BY4742 <i>spr3Δ::kanMX4</i>                                                       | This work                            |
| MMY0152              | BY4741 <i>spr28Δ::kanMX4</i>                                                      | (Winzeler <i>et al.</i> , 1999)      |
| MMY0153              | BY4742 <i>spr28Δ::kanMX4</i>                                                      | (Winzeler <i>et al.</i> , 1999)      |
| MMY0155 <sup>c</sup> | FY2742 <i>spr28Δ::kanMX4</i>                                                      | This work                            |
| MMY0184              | BY4741 <i>spr3Δ::kanMX4</i>                                                       | (Winzeler <i>et al.</i> , 1999)      |
| MMY0185 <sup>c</sup> | FY2839 <i>spr3Δ::kanMX4</i>                                                       | This work                            |
| MMY0186 <sup>c</sup> | FY2839 <i>spr28Δ::kanMX4</i>                                                      | This work                            |
| MMY0187              | BY4743 <i>sma1Δ::kanMX4/sma1Δ::kanMX4</i>                                         | (Winzeler <i>et al.</i> , 1999)      |
| MMY0233              | BY4741 <i>sma1Δ::kanMX4</i>                                                       | (Winzeler <i>et al.</i> , 1999)      |
| MMY0188              | BY4743 <i>ssp1Δ::kanMX4/ssp1Δ::kanMX4</i>                                         | (Winzeler <i>et al.</i> , 1999)      |
| MMY0189              | BY4743 <i>sma2Δ::kanMX4/sma2Δ::kanMX4</i>                                         | (Winzeler <i>et al.</i> , 1999)      |
| MMY0192              | BY4743 <i>ssp1Δ::kanMX4/ssp1Δ::kanMX4</i>                                         | (Winzeler <i>et al.</i> , 1999)      |
| MMY0193              | BY4743 <i>osw1Δ::kanMX4/osw1Δ::kanMX4</i>                                         | (Winzeler <i>et al.</i> , 1999)      |
| MMY0195              | BY4743 <i>don1Δ::kanMX4/don1Δ::kanMX4</i>                                         | (Winzeler <i>et al.</i> , 1999)      |
| MMY0196              | BY4743 <i>spo71Δ::kanMX4/spo71Δ::kanMX4</i>                                       | (Winzeler <i>et al.</i> , 1999)      |
| MMY0197              | BY4743 <i>spo1Δ::kanMX4/spo1Δ::kanMX4</i>                                         | (Winzeler <i>et al.</i> , 1999)      |
| MMY0198              | BY4743 <i>spo19Δ::kanMX4/spo19Δ::kanMX4</i>                                       | (Winzeler <i>et al.</i> , 1999)      |
| MMY0199              | BY4743 <i>spo14Δ::kanMX4/spo14Δ::kanMX4</i>                                       | (Winzeler <i>et al.</i> , 1999)      |

|                       |                                                                                                    |                                                            |
|-----------------------|----------------------------------------------------------------------------------------------------|------------------------------------------------------------|
| MMY0200 <sup>d</sup>  | BY4743 <i>spr3Δ::kanMX4/spr3Δ::kanMX4 HTB2-tdTomato::HIS3MX/HTB2</i>                               | This work                                                  |
| MMY0238 <sup>d</sup>  | BY4743 <i>spr28Δ::kanMX4/spr28Δ::kanMX4 HTB2-tdTomato::HIS3MX/HTB2</i>                             | This work                                                  |
| MMY0236 <sup>d</sup>  | BY4743 <i>HTB2-tdTomato::HIS3MX/HTB2</i>                                                           | This work                                                  |
| MMY0201               | BY4743 <i>CDC3/cdc3Δ::kanMX</i>                                                                    | (Winzeler <i>et al.</i> , 1999)                            |
| MMY0202               | BY4743 <i>SHS1/shs1Δ::kanMX</i>                                                                    | (Winzeler <i>et al.</i> , 1999)                            |
| MMY0203 <sup>e</sup>  | BY4743 <i>ADY3-GFP::URA3</i>                                                                       | This work                                                  |
| MMY0204 <sup>e</sup>  | BY4743 <i>spr3Δ::kanMX/spr3Δ::kanMX ADY3-GFP::URA3</i>                                             | This work                                                  |
| MMY0232 <sup>f</sup>  | <i>MATa/α spr3Δ::kanMX/spr3Δ::kanMX sma1Δ::kanMX/sma1Δ::kanMX [pLA10]</i>                          | This work                                                  |
| 792-10-1 <sup>g</sup> | <i>MATa ade2-1 can1-100 trp1-1 ura3-1 his3-11,15 LEU2::P<sub>URA3</sub>-tetR-GFP</i>               | (Jin <i>et al.</i> , 2012)                                 |
| yJM808 <sup>h</sup>   | <i>CEN4::tetOx448::URA3 MATa can1-100 trp1-1 ura3-1 his3-11,15 LEU2::P<sub>URA3</sub>-tetR-GFP</i> | Jeff Moore, University of Colorado Anschutz Medical Campus |
| MMY0234               | <i>CEN4::tetOx448::URA3 SPC110-DsRed::HIS3</i><br>yJM808 x MMY0220                                 | This work                                                  |

<sup>a</sup> To make heterozygous BY4743-background diploid strains, this haploid was mated with an appropriate partner and loss of the *URA3*-marked plasmid was selected using medium with 5-fluoro-orotic acid (Boeke *et al.*, 1984).

<sup>b</sup> JRY8012 was transformed with an integrating PCR product, amplified from template plasmid pKT146, that contained a *tdTomato::his5MX* cassette and flanking homology targeting the end of the *HTB2* ORF.

<sup>c</sup> The parent strain was transformed with a PCR product, amplified from genomic DNA of the appropriate strain from the deletion collection (Winzeler *et al.*, 1999), that contained a *kanMX6* cassette and flanking homology targeting the entire *SPR3* ORF.

<sup>d</sup> The *HTB2-tdTomato::his5MX* allele was amplified from genomic DNA of strain MMY0019 using primers flanking the *HTB2* locus, and transformed into an appropriate diploid strain.

<sup>e</sup> pAM34-2 was linearized with *EcoRI* and integrated at the *ADY3* locus.

<sup>f</sup> MMY0233 was mated to MMY0220, the heterozygous diploid was sporulated, and *sma1Δ spr3Δ* spores with complementary mating types were mated together. The resulting diploid was transformed with pLA10.

<sup>g</sup> The *tetO* array is integrated ~2 kb from *CEN4* in this W303-background strain.

<sup>h</sup> 792-10-1 was backcrossed six times with a strain of the YEF473 strain background harboring *SPC110-DsRed::HIS3*.

**Table S2. Plasmids used in this work**

| PLASMID                                        | RELEVANT PROPERTIES                            | SOURCE/REFERENCE                             |
|------------------------------------------------|------------------------------------------------|----------------------------------------------|
| pLA10                                          | <i>CEN URA3 CDC10-GFP</i>                      | (Cid <i>et al.</i> , 1998)                   |
| pZL04                                          | <i>CEN HIS3 CDC10-mCherry</i>                  | Jeremy Thorner, Univ. California at Berkeley |
| pMVB66                                         | <i>CEN URA3 CDC12</i>                          | Jeremy Thorner, Univ. California at Berkeley |
| pMVB100                                        | <i>CEN URA3 CDC3</i>                           | (Versele <i>et al.</i> , 2004)               |
| pML113                                         | <i>CEN LEU2 his3MX CDC12-eCitrine</i>          | (Nagaraj <i>et al.</i> , 2008)               |
| pSPR1-GFP (B1913)                              | <i>CEN URA3 SPR1-GFP</i>                       | JoAnne Engebrecht, Univ. California at Davis |
| pRS316                                         | <i>CEN URA3</i>                                | (Sikorski and Hieter, 1989)                  |
| pKT146                                         | <i>tdTomato::his5MX</i>                        | (Sheff and Thorn, 2004)                      |
| YE <p><i>P<sub>GAL</sub>-GST-His6-URA3</i></p> | <i>2 μm URA3 P<sub>GAL</sub>-GST-His6-URA3</i> | (Sopko <i>et al.</i> , 2006)                 |
| YE <p><i>P<sub>GAL</sub>-GST-His6-URA3</i></p> | <i>2 μm URA3 P<sub>GAL</sub>-GST-His6-URA3</i> | (Sopko <i>et al.</i> , 2006)                 |
| YE <p><i>P<sub>GAL</sub>-GST-His6-SPR3</i></p> | <i>2 μm URA3 P<sub>GAL</sub>-GST-His6-SPR3</i> | (Sopko <i>et al.</i> , 2006)                 |
| YE <p><i>P<sub>GAL</sub>-GST-His6-SSP1</i></p> | <i>2 μm URA3 P<sub>GAL</sub>-GST-His6-SSP1</i> | (Sopko <i>et al.</i> , 2006)                 |
| pAM34-2                                        | <i>URA3 GFP-ADY3</i>                           | (Moreno-Borchart <i>et al.</i> , 2001)       |



## Supplemental References

Boeke, J. D., LaCrute, F., and Fink, G. R. (1984). A positive selection for mutants lacking orotidine-5'-phosphate decarboxylase activity in yeast: 5-fluoro-orotic acid resistance. *Mol. Gen. Genet.* *197*, 345–346.

Brachmann, C. B., Davies, A., Cost, G. J., Caputo, E., Li, J., Hieter, P., and Boeke, J. D. (1998). Designer deletion strains derived from *Saccharomyces cerevisiae* S288C: a useful set of strains and plasmids for PCR-mediated gene disruption and other applications. *Yeast* *14*, 115–132.

Cid, V. J., Adamíková, L., Cenamor, R., Molina, M., Sánchez, M., and Nombela, C. (1998). Cell integrity and morphogenesis in a budding yeast septin mutant. *Microbiology* *144* ( Pt 12), 3463–3474.

Davidow, L. S., Goetsch, L., and Byers, B. (1980). Preferential Occurrence of Nonsister Spores in Two-Spored Asci of *Saccharomyces Cerevisiae*: Evidence for Regulation of Spore-Wall Formation by the Spindle Pole Body. *Genetics* *94*, 581–595.

Huxley, C., Green, E. D., and Dunham, I. (1990). Rapid assessment of *S. cerevisiae* mating type by PCR. *Trends Genet.* *6*, 236.

Jeong, H., Herskowitz, I., Kroetz, D. L., and Rine, J. (2007). Function-altering SNPs in the human multidrug transporter gene ABCB1 identified using a *Saccharomyces*-based assay. *PLoS Genet.* *3*, e39.

Jin, F., Liu, H., Li, P., Yu, H.-G., and Wang, Y. (2012). Loss of function of the Cik1/Kar3 motor complex results in chromosomes with syntelic attachment that are sensed by the tension checkpoint. *PLoS Genet.* *8*, e1002492.

McMurray, M. A., Bertin, A., Garcia, G., 3rd, Lam, L., Nogales, E., and Thorner, J. (2011). Septin filament formation is essential in budding yeast. *Dev. Cell* *20*, 540–549.

Moreno-Borchart, A. C., Strasser, K., Finkbeiner, M. G., Shevchenko, A., Shevchenko, A., and Knop, M. (2001). Prospore membrane formation linked to the leading edge protein (LEP) coat assembly. *EMBO J.* *20*, 6946–6957.

Nagaraj, S., Rajendran, A., Jackson, C. E., and Longtine, M. S. (2008). Role of nucleotide binding in septin-septin interactions and septin localization in *Saccharomyces cerevisiae*. *Mol. Cell. Biol.* *28*, 5120–5137.

Sheff, M. A., and Thorn, K. S. (2004). Optimized cassettes for fluorescent protein tagging in *Saccharomyces cerevisiae*. *Yeast* *21*, 661–670.

Sikorski, R. S., and Hieter, P. (1989). A system of shuttle vectors and yeast host strains designed for efficient manipulation of DNA in *Saccharomyces cerevisiae*. *Genetics* *122*, 19–27.

Sopko, R. *et al.* (2006). Mapping pathways and phenotypes by systematic gene overexpression. *Mol. Cell* *21*, 319–330.

Suda, Y., Nakanishi, H., Mathieson, E. M., and Neiman, A. M. (2007). Alternative modes of organellar segregation during sporulation in *Saccharomyces cerevisiae*. *Eukaryot. Cell* *6*, 2009–2017.

Versele, M., Gullbrand, B., Shulewitz, M. J., Cid, V. J., Bahmanyar, S., Chen, R. E., Barth, P., Alber, T., and Thorner, J. (2004). Protein-protein interactions governing septin heteropentamer assembly and septin filament organization in *Saccharomyces cerevisiae*. *Mol. Biol. Cell* 15, 4568–4583.

Winzler, E. A. *et al.* (1999). Functional Characterization of the *S. cerevisiae* Genome by Gene Deletion and Parallel Analysis. *Science* 285, 901–906.
